# Supplementary material for: Systematic review and meta‐analysis of genomic alterations in acral melanoma
Source: PubMed Central journal article supplement (PMC9540316; doi:10.1111/pcmr.13034), 2022-03-07

# **Supplementary Figures & Legends**

## **Systematic review and meta-analysis of genomic alterations in acral melanoma**

Natasa Broit<sup>1,2</sup>, Peter A. Johansson<sup>1</sup>, Chloe B. Rodgers,<sup>3</sup> Sebastian T. Walpole,<sup>1</sup> Nicholas K. Hayward<sup>1</sup>,  
Antonia L. Pritchard<sup>1,3</sup>

\*\*\*

### **Supplementary Figure Legends**

**Supplementary Fig. S1 | Further mutations in genes encoding components of cytoplasmic signaling (multiple pathways).** **A.** Mutations in genes encoding components of cytoplasmic signaling ( $n = 181$ ). **B.** Mutations and copy number alterations in genes encoding components of cytoplasmic signaling ( $n = 125$ ).

**Supplementary Fig. S2 | Further mutations in genes encoding ligands and receptors (multiple families).** **A.** Mutations in genes encoding ligands and receptors ( $n = 181$ ). **B.** Mutations and copy number alterations in genes encoding ligands and receptors ( $n = 125$ ).

**Supplementary Fig. S3 | Further mutations in genes encoding components of the cell cycle.** **A.** Mutations in genes encoding components of the cell cycle ( $n = 181$ ). **B.** Mutations and copy number alterations in genes encoding components of the cell cycle ( $n = 125$ ).

**Supplementary Fig. S4 | Further mutations in genes encoding components of DNA repair pathways.** **A.** Mutations in genes encoding proteins involved in DNA repair pathways ( $n = 181$ ). **B.** Mutations and copy number alterations in genes involved in DNA repair pathways ( $n = 125$ ).

**Supplementary Fig. S5 | Further mutations in genes encoding proteins involved in chromatin modifications.** **A.** Mutations in genes encoding proteins involved in chromatin modification ( $n = 181$ ). **B.** Mutations and copy number alterations in genes involved in chromatin modifications ( $n = 125$ ).

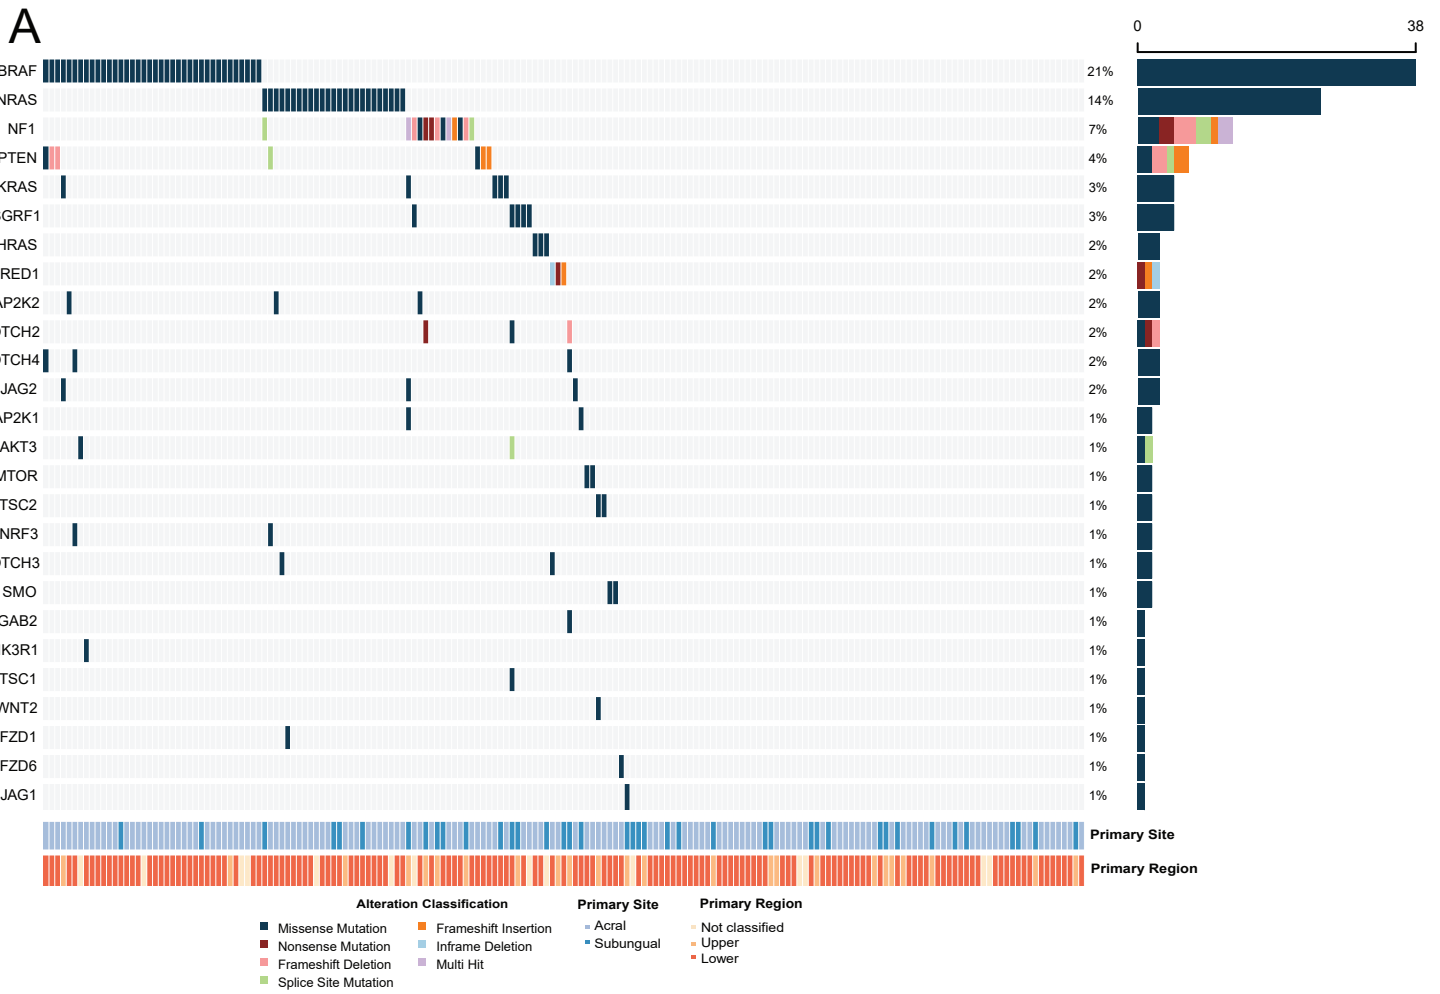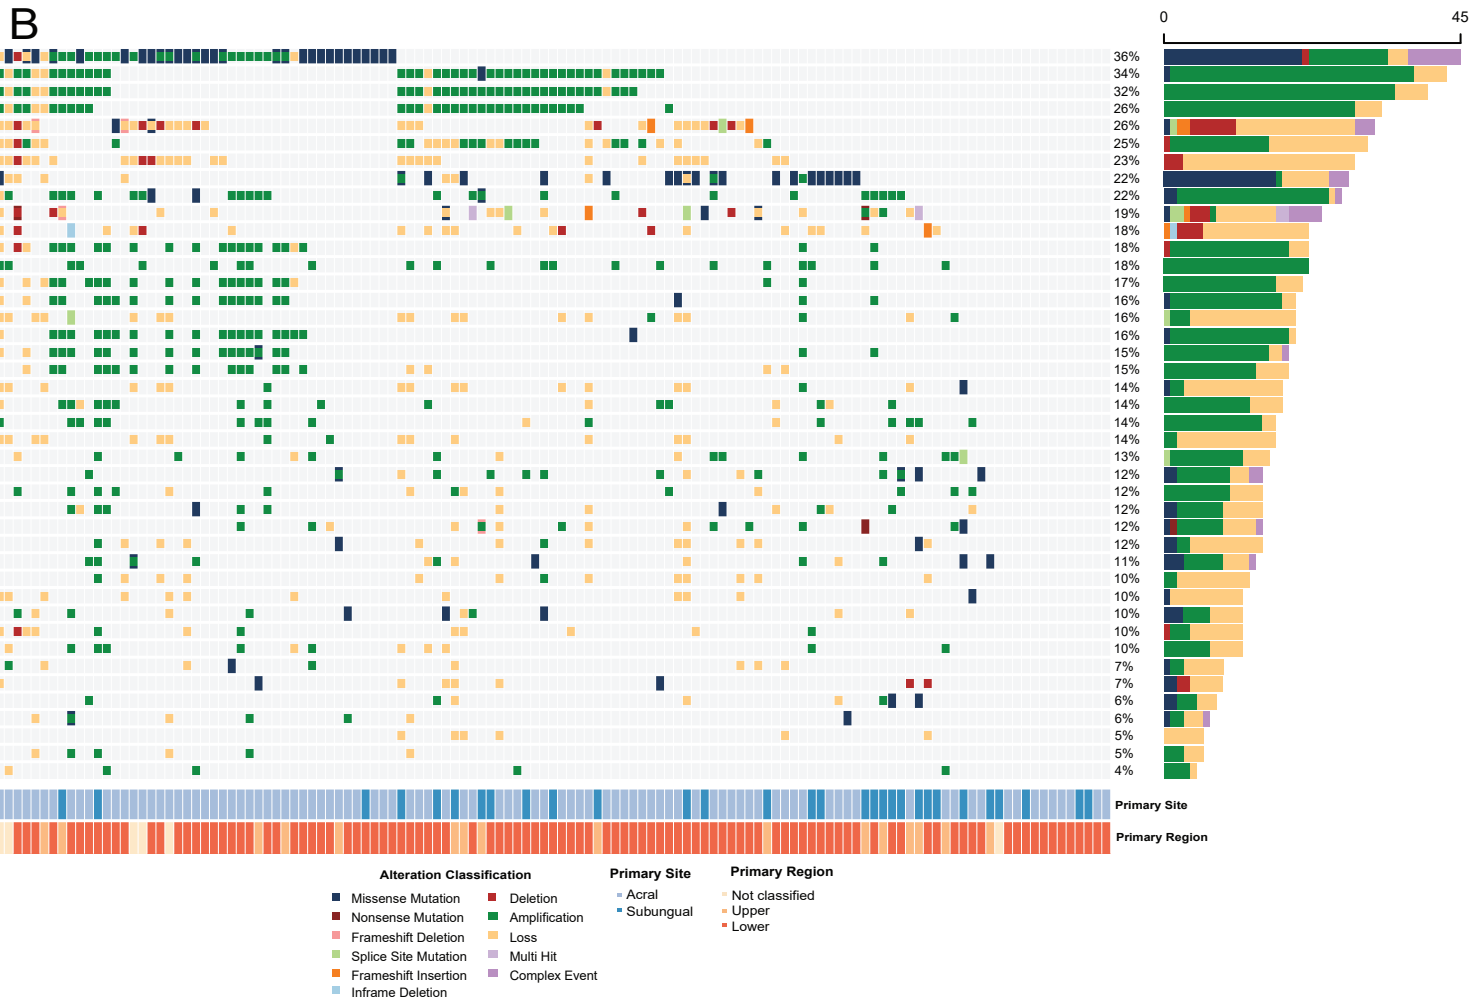

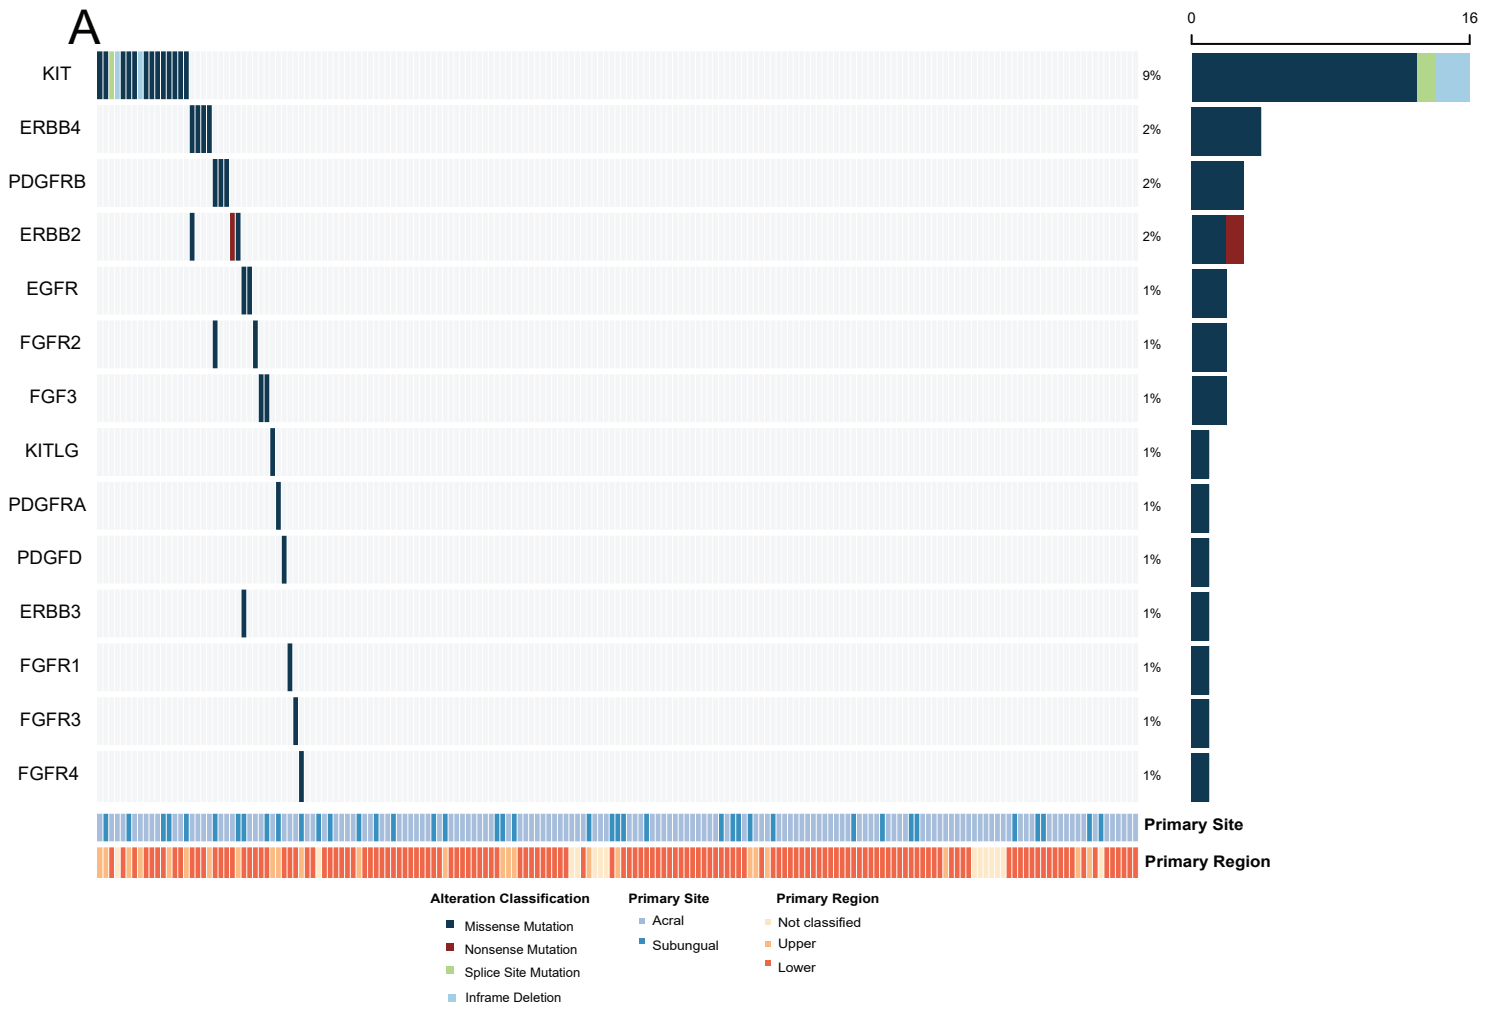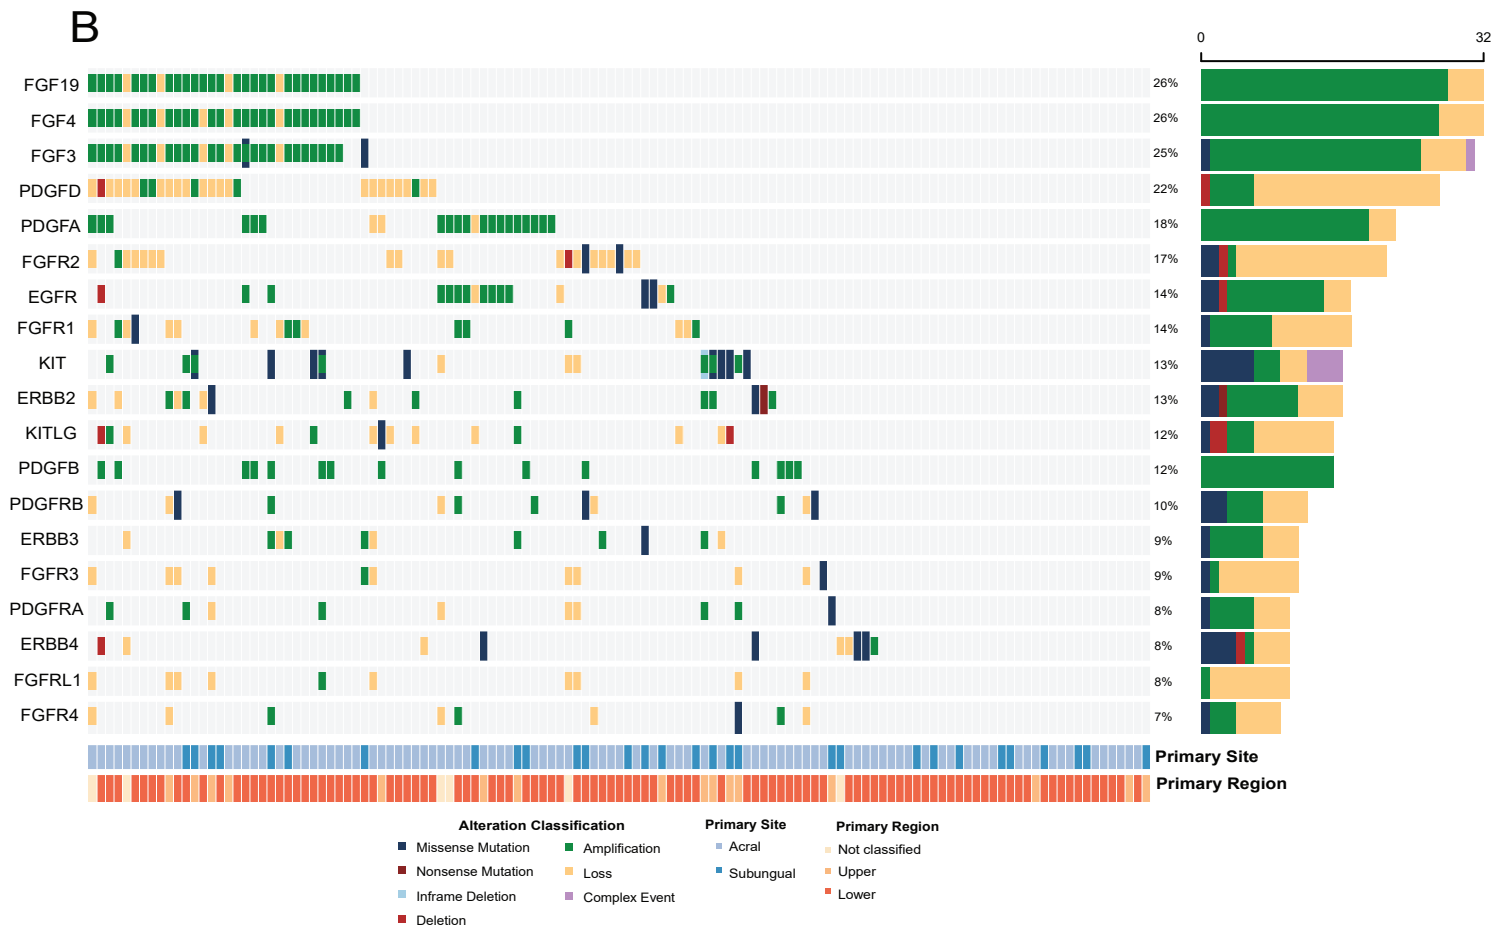

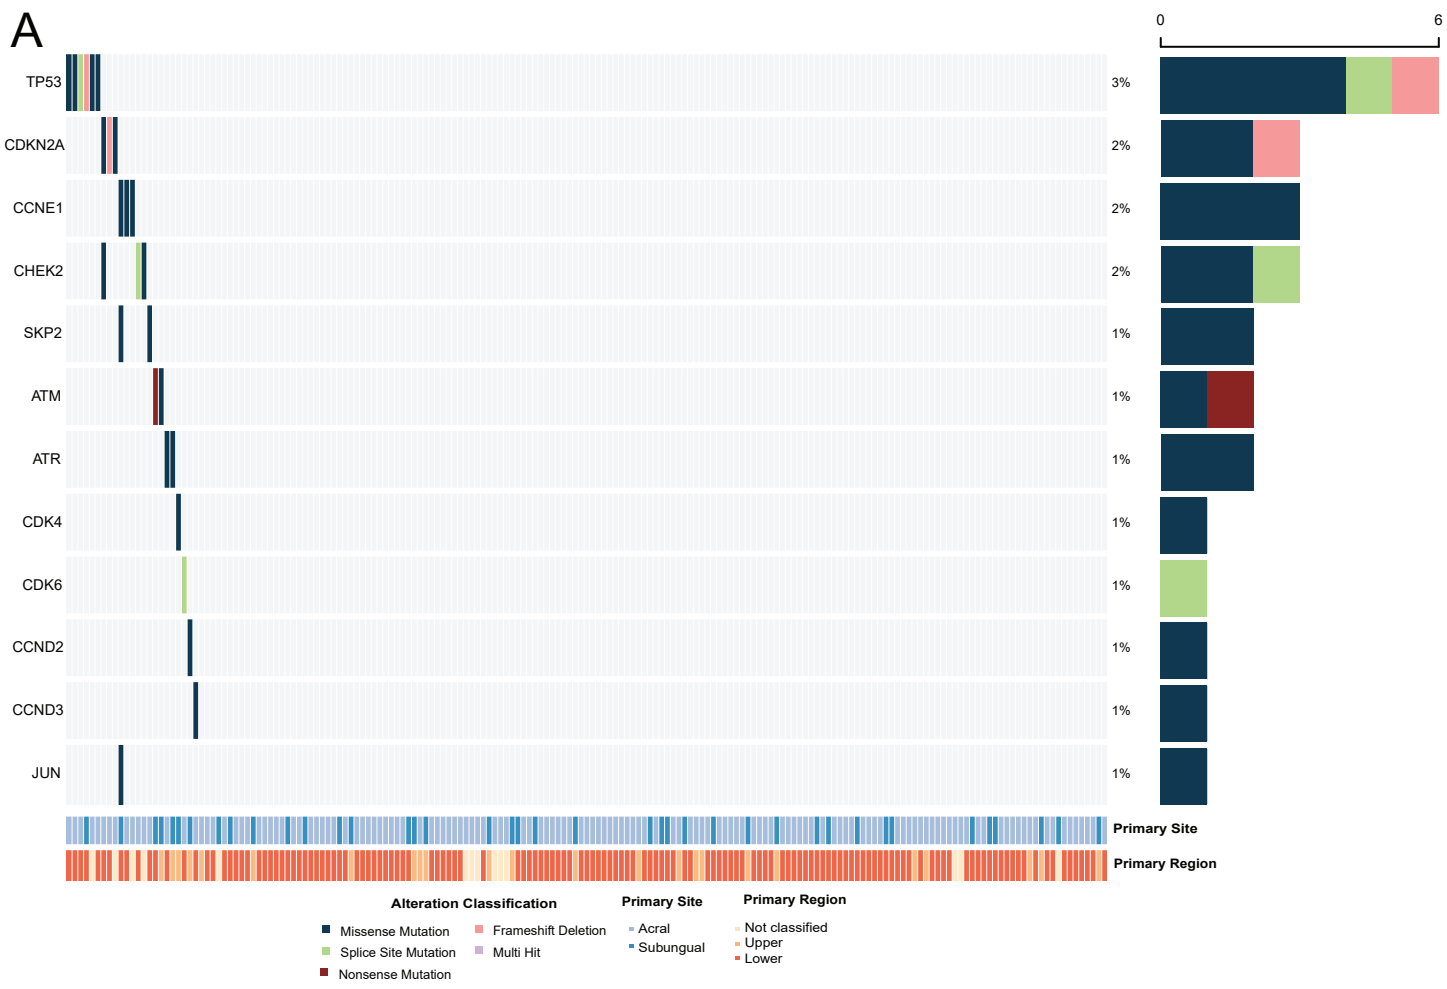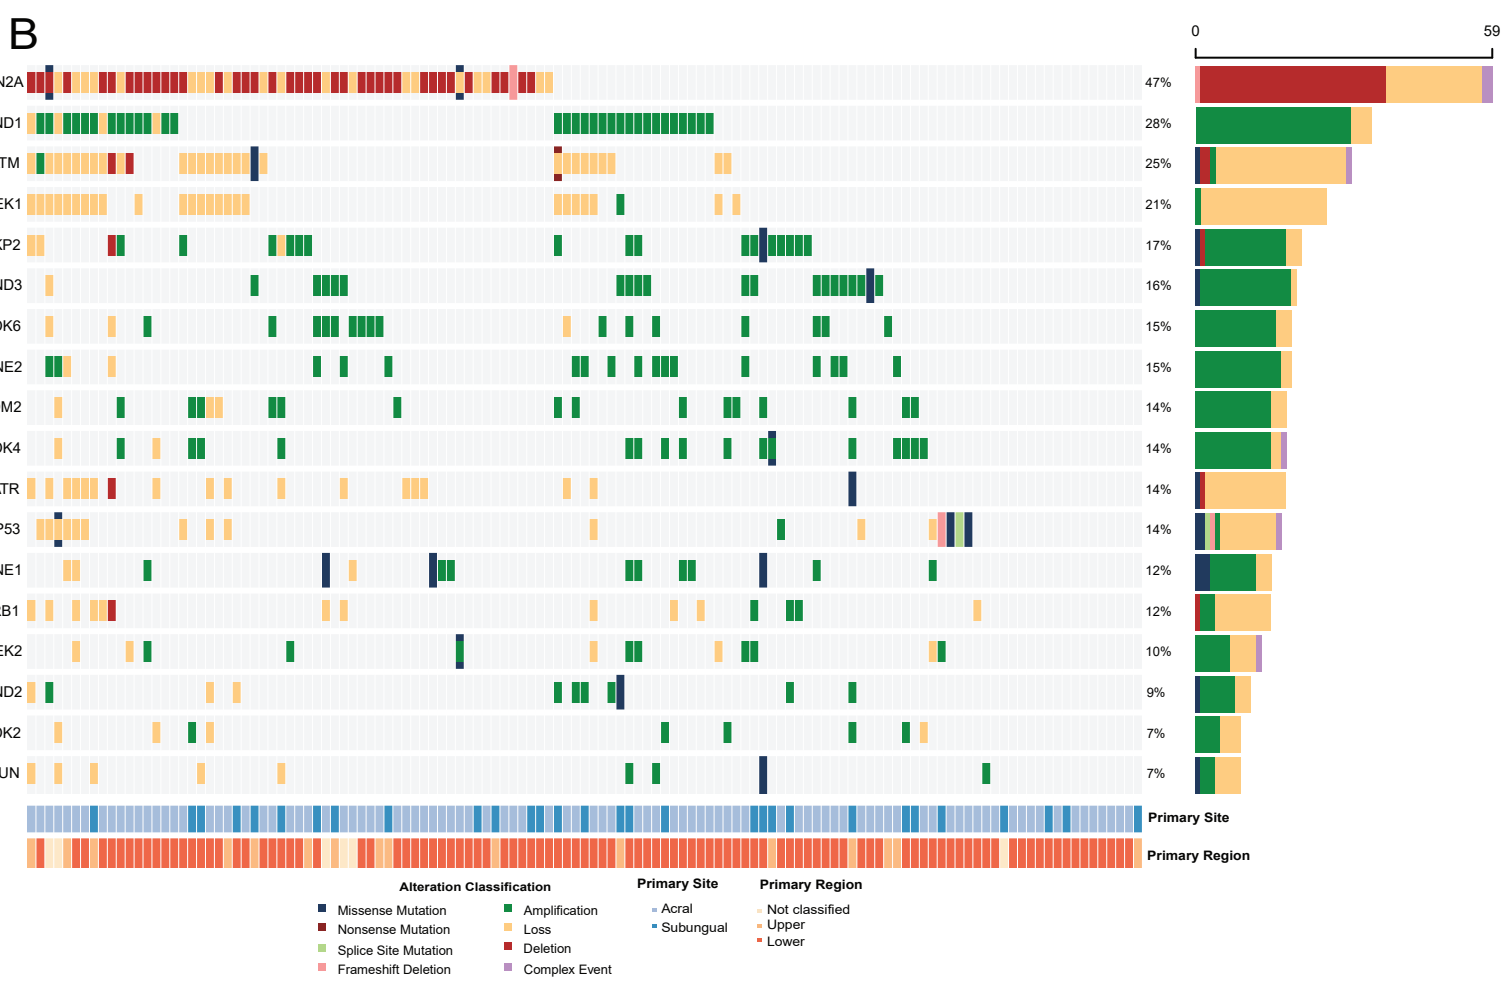

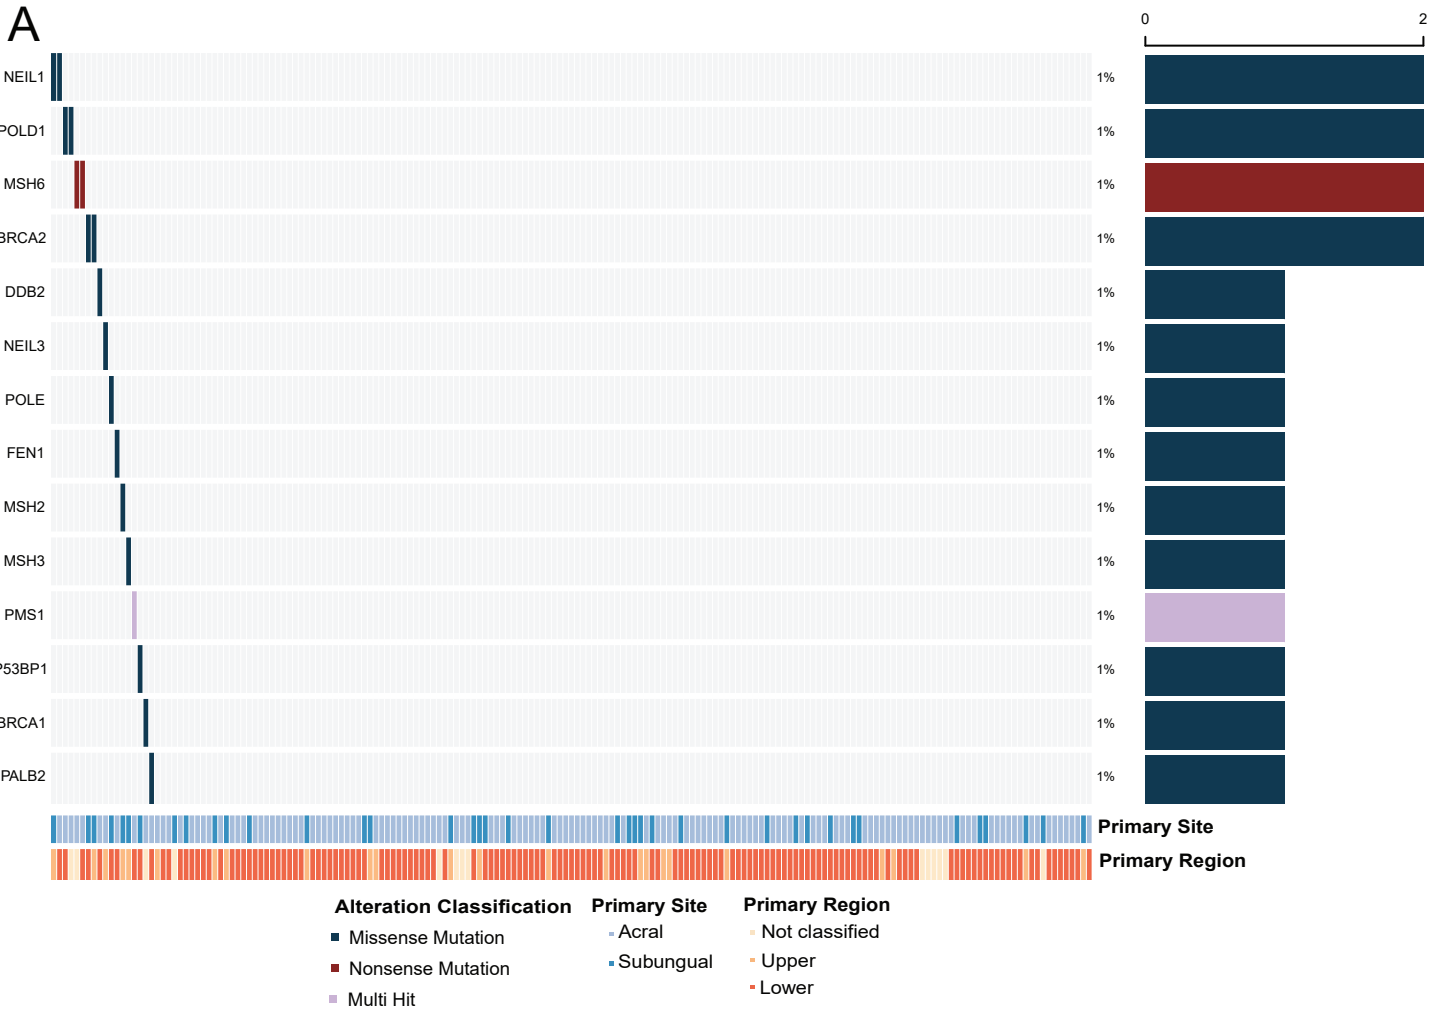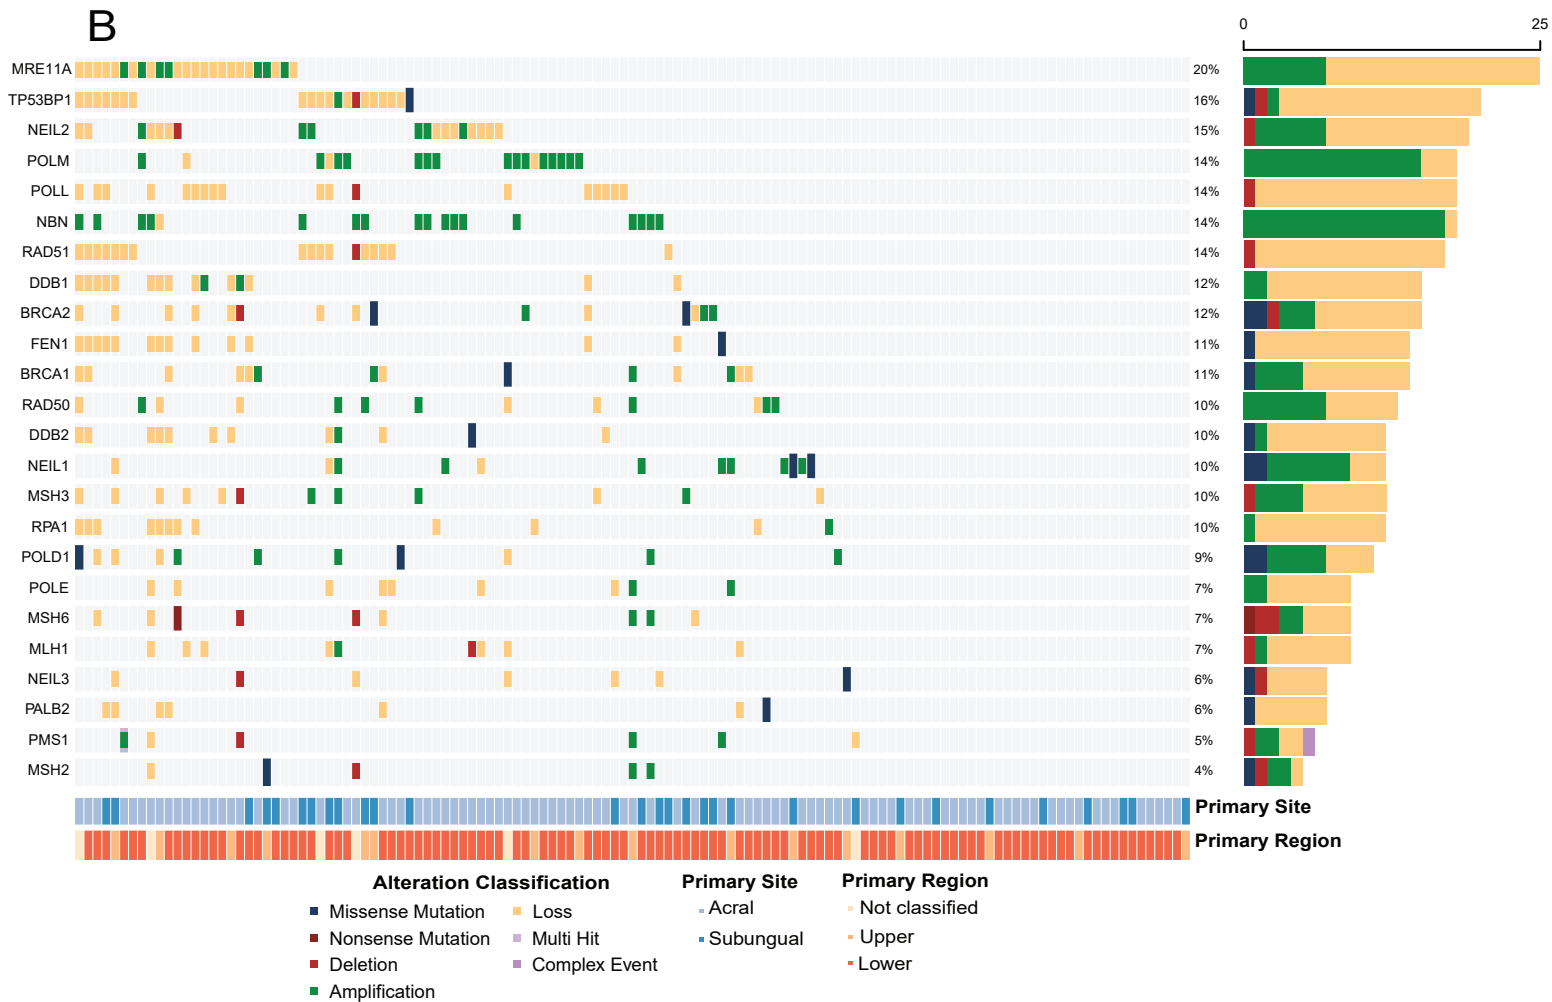

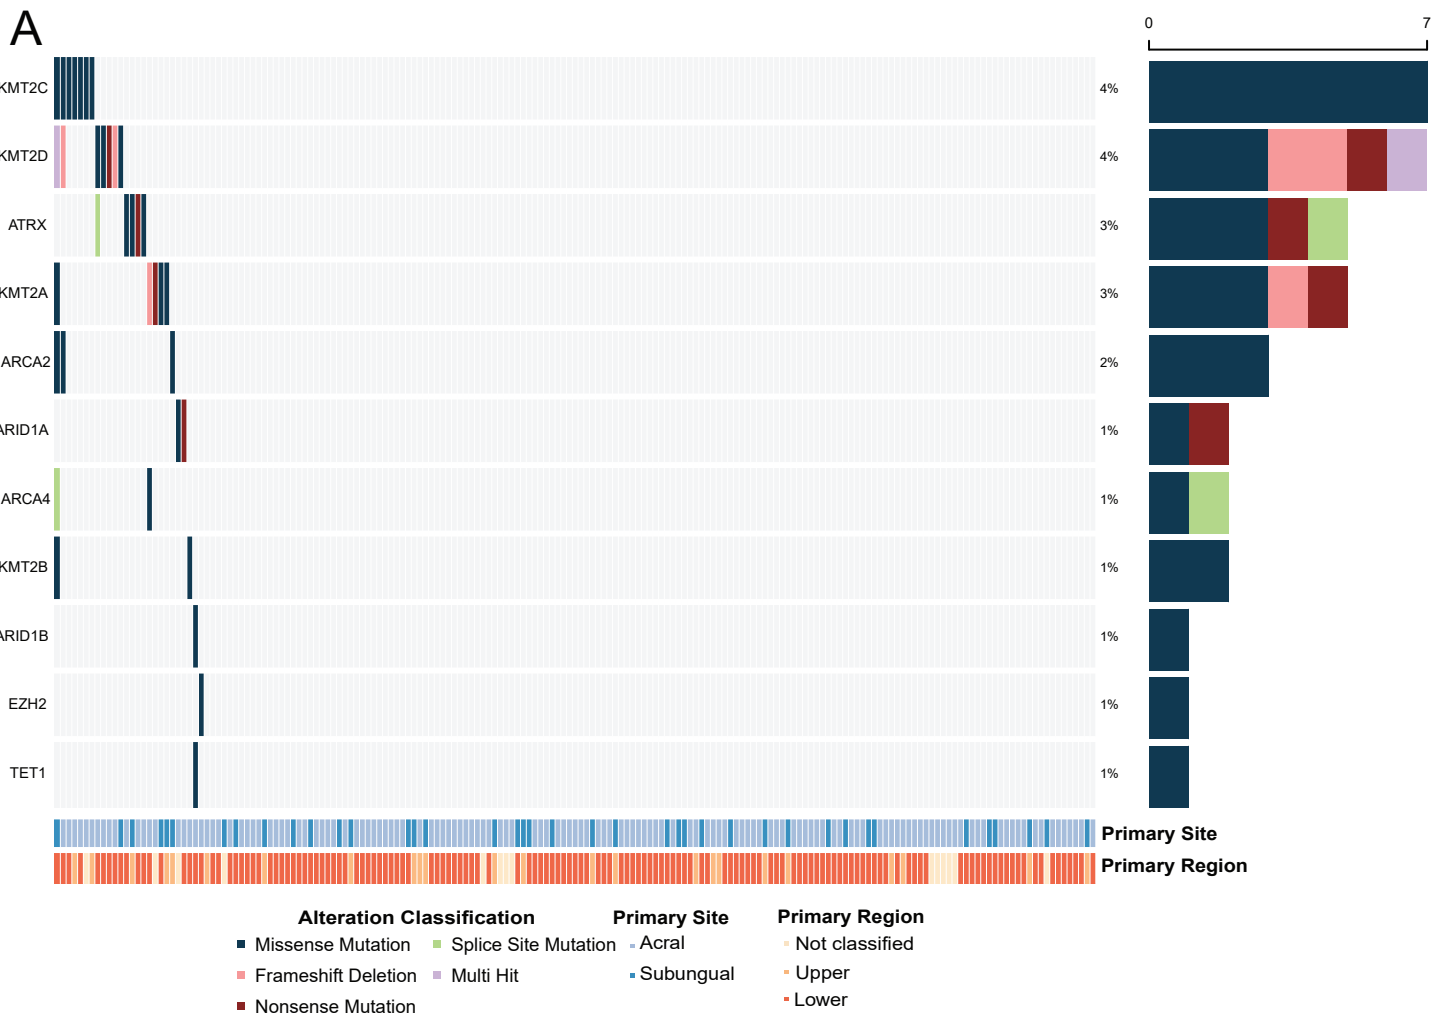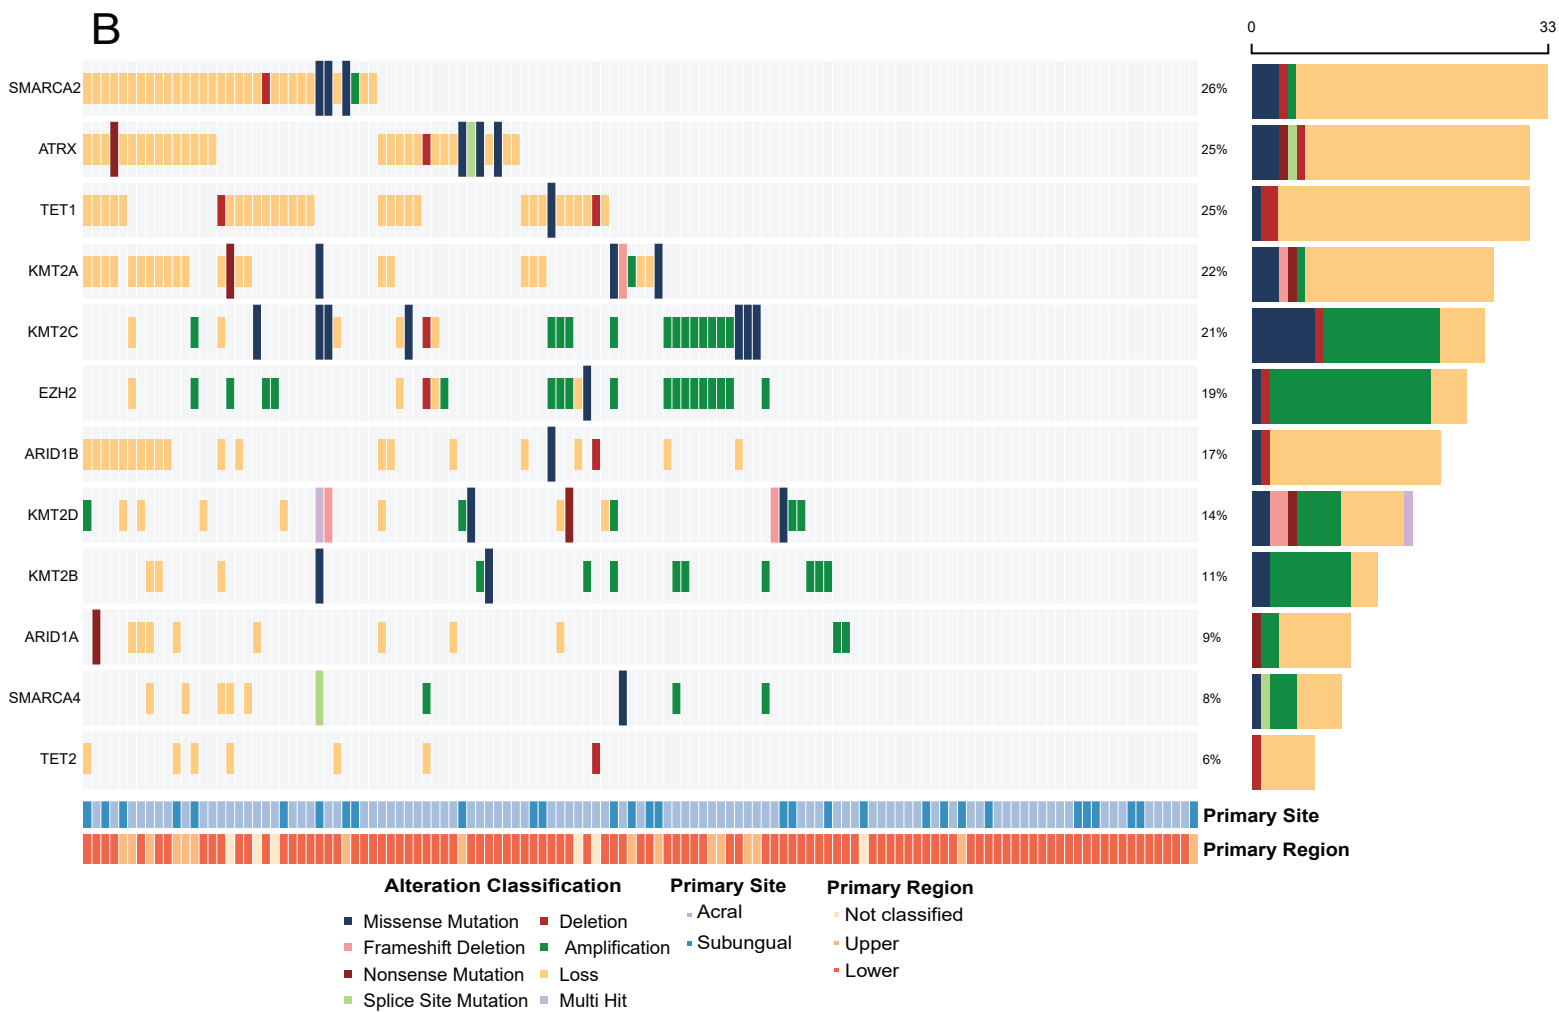

Supplement: PCMR-35-369-s004.pdf [file PCMR-35-369-s004.pdf]
