# Supplementary material for: Systematic review and meta‐analysis of genomic alterations in acral melanoma
Source: PubMed Central journal article supplement (PMC9540316; doi:10.1111/pcmr.13034), 2022-03-07
Supplement: PCMR-35-369-s002.pdf [file PCMR-35-369-s002.pdf]

**Table S2A | *BRAF* targeted hotspot studies**

| Reference                                     | Sub-Type          | Exon | Mutation          | Mutations (n) | Samples (n) | Exons Sequenced    |
|-----------------------------------------------|-------------------|------|-------------------|---------------|-------------|--------------------|
| (Shim et al., 2017)                           | Acral & Subungual | 15   | V600E             | 2             | 28          | Hotspots of 11, 15 |
| (Choi, Chun, Jin, Lee, & Yun, 2013)           | Acral & Subungual | 15   | V600E             | 2             | 33          | 15                 |
| (Zebary et al., 2013)                         | Acral & Subungual | 11   | G469A             | 1             | 88          | 11, 15             |
|                                               |                   | 15   | V600E             | 13            |             |                    |
|                                               |                   | 15   | V600K             | 1             |             |                    |
| Si, et al                                     | Acral             | 11   | G442S             | 1             | 148         | 11, 15             |
|                                               |                   | 11   | W450stop          | 1             |             |                    |
|                                               |                   | 11   | G466R             | 1             |             |                    |
|                                               |                   | 15   | D594G             | 1             |             |                    |
|                                               |                   | 15   | V600E             | 18            |             |                    |
|                                               |                   | 15   | W604stop          | 1             |             |                    |
| (Colombino et al., 2013)                      | Acral             | 15   | V600E             | 2             | 11          | 15                 |
| (Jin et al., 2013)                            | Acral             | 15   | V600E             | 3             | 110         | 11, 15             |
| (Oyama et al., 2015)                          | Acral             | 15   | V600E             | 13            | 20          | 15                 |
| (Lang & MacKie, 2005)                         | Acral             | 15   | V600E             | 2             | 13          | 15                 |
| (Puig-Butille et al., 2013)                   | Acral             | None | None              | None          | 17          | 11, 15             |
| (X. Kang et al., 2018)                        | Acral             | 15   | L597Q             | 1             | 19          | 11, 15             |
|                                               |                   | 11   | P453H             | 1             |             |                    |
| (Moon et al., 2018)                           | Acral             | 15   | V600E             | 17            | 64          | 1 - 18             |
|                                               |                   | 11   | Y471_K472insYGTVY | 1             |             |                    |
|                                               |                   | 15   | K601N             | 1             |             |                    |
|                                               |                   | 15   | D594G             | 1             |             |                    |
|                                               |                   | 15   | G596R             | 1             |             |                    |
|                                               |                   | 1    | D22N              | 1             |             |                    |
| (Ashida, Takata, Murata, Kido, & Saida, 2009) | Acral             | 15   | V600E             | 3             | 22          | 15                 |
| (Akslen et al., 2008)                         | Acral             | 11   | G466V             | 1             | 24          | 11, 15             |
|                                               |                   | 15   | V600E             | 1             | 25          |                    |
|                                               | Acral             | 15   | V600E             | 18            | 84          | 15                 |

|                                          |                   |        |              |    |     |                    |
|------------------------------------------|-------------------|--------|--------------|----|-----|--------------------|
| (Carvajal et al., 2011)                  |                   | 15     | I592del      | 1  |     |                    |
| (Dika et al., 2020)                      | Acral & Subungual | 15     | V600E        | 3  | 31  | 15                 |
|                                          |                   | 15     | K601E        | 1  |     |                    |
| (Gao, Tsai, Perng, Wang, & Chiang, 2018) | Acral             | 15     | V600E        | 6  | 40  | 11, 15             |
|                                          |                   | 15     | V600L        | 6  |     |                    |
| (Yun et al., 2011)                       | Acral             | /      | None         | /  | 49  | 15                 |
| (Zaremba et al., 2019)                   | Acral & Subungual | 15     | V600E        | 15 | 50  | 1 - 18             |
| (Shi et al., 2019)                       | Acral             | 15     | V600E        | 6  | 29  | 1 - 18             |
|                                          |                   | 15     | V600K        | 1  |     |                    |
|                                          |                   | 15     | K601E        | 1  |     |                    |
| (Yeh et al., 2019)                       | Acral             | 15     | V600E        | 21 | 122 | 1 - 18             |
|                                          |                   | 11     | G469S        | 1  |     |                    |
|                                          |                   | 15     | K601E        | 1  |     |                    |
|                                          |                   | 15     | V600K        | 3  |     |                    |
| (Hilke et al., 2020)                     | Acral             | 15     | V600E        | 1  | 14  | 1 - 18             |
| (Borkowska et al., 2020)                 | Subungual         | 15     | V600E        | 1  | 31  | Hotspots of 11, 15 |
| (Zou et al., 2020)                       | Acral             | 15     | V600E        | 10 | 54  | 1 - 18             |
|                                          |                   | 15     | V600E, T599R | 1  |     |                    |
|                                          |                   | 15     | L597Q, D565E | 1  |     |                    |
|                                          |                   | 11     | G466A        | 1  |     |                    |
|                                          |                   | 15, 10 | V600E, S394P | 1  |     |                    |
|                                          |                   | 11     | G469A        | 1  |     |                    |
| (Cirenajwis et al., 2017)                | Acral             | 15     | V600E        | 1  | 6   | 1 - 18             |
| (Sheen et al., 2020)                     | Acral             | 15     | V600E        | 3  | 45  | 1 - 18             |
|                                          |                   | 12     | E501K        | 1  |     |                    |
| (Niu et al., 2013)                       | Acral             | 15     | V600E        | 5  | 30  | Hotspots of 11, 15 |

**Table S2B | *NRAS* targeted hotspot studies**

| Reference                   | Sub-Type          | Exon | Mutation | Mutations (n) | Samples (n) | Exons Sequenced |
|-----------------------------|-------------------|------|----------|---------------|-------------|-----------------|
| (Uhara et al., 2014)        | Acral             | 3    | Q61K     | 4             | 54          | 2, 3            |
|                             |                   | 2    | G12A     | 1             |             |                 |
| (Zebary et al., 2013)       | Acral & Subungual | 2    | G12C     | 1             | 88          | 2, 3            |
|                             |                   | 2    | D33E     | 1             |             |                 |
|                             |                   | 3    | Q61R     | 8             |             |                 |
|                             |                   | 3    | Q61L     | 2             |             |                 |
|                             |                   | 3    | Q61K     | 1             |             |                 |
| (Si et al., 2012)           | Acral             | 2    | G12C     | 1             | 148         | 2, 3            |
|                             |                   | 2    | G13R     | 1             |             |                 |
|                             |                   | 3    | A59D     | 1             |             |                 |
|                             |                   | 3    | Q61K     | 1             |             |                 |
|                             |                   | 3    | Q61L     | 1             |             |                 |
|                             |                   | 3    | Q61R     | 8             |             |                 |
| (Oyama et al., 2015)        | Acral             | None | None     | None          | 20          | 2               |
| (Puig-Butille et al., 2013) | Acral             | 2    | G12V     | 2             | 17          | 2, 3            |
|                             |                   | 3    | Q61H     | 1             |             |                 |
| (Moon et al., 2018)         | Acral             | 3    | Q61R     | 4             | 64          | 1 - 7           |
|                             |                   | 2    | G12D     | 2             |             |                 |
|                             |                   | 3    | S173R    | 1             |             |                 |
|                             |                   | 2    | G13R     | 2             |             |                 |
|                             |                   | 3    | Q61K     | 3             |             |                 |
|                             |                   | 3    | Y64D     | 1             |             |                 |
|                             |                   | 3    | Q61H     | 1             |             |                 |
| (Ashida et al., 2009)       | Acral             | None | None     | None          | 22          | 3               |
| (Sheen et al., 2016)        | Acral             | 2    | G13D     | 2             | 89          | 2, 3            |
|                             |                   | 3    | Q61L     | 6             |             |                 |
|                             |                   | 3    | Q61R     | 1             |             |                 |
| (Akslen et al., 2008)       | Acral             | 2    | G12D     | 3             | 26          | 2, 3            |
|                             |                   | 3    | None     | 0             | 24          |                 |

|                         |                              |   |                |    |     |                  |
|-------------------------|------------------------------|---|----------------|----|-----|------------------|
| (Carvajal et al., 2011) | Acral                        | 3 | T58I, Y64H     | 1  | 84  | 2, 3             |
|                         |                              | 3 | Q61K           | 4  |     |                  |
|                         |                              | 3 | Q61H           | 2  |     |                  |
|                         |                              | 3 | Q61R           | 1  |     |                  |
|                         |                              | 2 | G12C           | 3  |     |                  |
|                         |                              | 2 | G12V           | 1  |     |                  |
|                         |                              | 2 | G13R           | 1  |     |                  |
| (Dika et al., 2020)     | Acral Melanoma and Subungual | 2 | G13R           | 1  | 30  | 2, 3             |
|                         |                              | 3 | Q61R           | 1  |     |                  |
|                         |                              | 3 | Q61R & Q43stop | 1  |     |                  |
|                         |                              | 3 | L79F & C80Y    | 1  |     |                  |
|                         |                              | 3 | E62K           | 1  |     |                  |
|                         |                              | 2 | G12V           | 1  |     |                  |
| (Gao et al., 2018)      | Acral Melanoma               | 2 | G13R           | 2  | 40  | 2, 3             |
|                         |                              | 2 | G12D           | 2  |     |                  |
| (Zaremba et al., 2019)  | Acral and Subungual          | 3 | Q61K           | 3  | 50  | 1 - 7            |
|                         |                              | 5 | A155V          | 1  |     |                  |
|                         |                              | 3 | Q61R           | 6  |     |                  |
|                         |                              | 3 | Q61H           | 1  |     |                  |
|                         |                              | 2 | G12S           | 1  |     |                  |
|                         |                              | 2 | G12D           | 2  |     |                  |
| (Shi et al., 2019)      | Acral                        | 2 | G13R           | 1  | 29  | 1 - 7            |
|                         |                              | 3 | Q61R           | 2  |     |                  |
| (Yeh et al., 2019)      | Acral                        | 2 | G12A           | 1  | 122 | 1 - 7            |
|                         |                              | 2 | G12C           | 3  |     |                  |
|                         |                              | 2 | G13D           | 1  |     |                  |
|                         |                              | 2 | G13R           | 3  |     |                  |
|                         |                              | 3 | Q61H           | 2  |     |                  |
|                         |                              | 3 | Q61K           | 7  |     |                  |
|                         |                              | 3 | Q61R           | 17 |     |                  |
| (Hilke et al., 2020)    | Acral                        | 3 | Q61R           | 1  | 14  | 1 - 7            |
|                         | Subungual                    | 2 | G12C           | 1  | 31  | Hotspots of 2, 3 |

|                           |       |   |       |   |    |                  |
|---------------------------|-------|---|-------|---|----|------------------|
| (Borkowska et al., 2020)  |       | 2 | G13D  | 1 |    |                  |
|                           |       | 3 | Q61R  | 1 |    |                  |
|                           |       | 3 | Q61K  | 1 |    |                  |
| (Zou et al., 2020)        | Acral | 2 | G12C  | 1 | 54 | 1 - 7            |
|                           |       | 2 | G13D  | 1 |    |                  |
|                           |       | 3 | Q61K  | 3 |    |                  |
| (Cirenajwis et al., 2017) | Acral | 3 | Q61R  | 1 | 6  | 1 - 7            |
| (Sheen et al., 2020)      | Acral | 3 | Q61L  | 1 | 45 | 1 - 7            |
|                           |       | 3 | Q61K  | 2 |    |                  |
|                           |       | 4 | A146T | 1 |    |                  |
|                           |       | 2 | G13D  | 1 |    |                  |
|                           |       | 2 | G12D  | 1 |    |                  |
| (Niu et al., 2013)        | Acral | 2 | G12C  | 1 | 30 | Hotspots of 2, 3 |
|                           |       | 3 | Q61L  | 1 |    |                  |

**Table S2C | *KIT* targeted hotspot studies**

| Reference                                | Sub-Type          | Exon | Mutation            | Mutations (n) | Samples (n) | Exons Sequenced    |
|------------------------------------------|-------------------|------|---------------------|---------------|-------------|--------------------|
| (Torres-Cabala et al., 2009)             | Acral             | 11   | L576P               | 1             | 39          | 11, 13, 17         |
|                                          |                   | 17   | D816V               | 1             |             |                    |
|                                          |                   | 11   | N566-D572 del       | 1             |             |                    |
|                                          |                   | 13   | N655K               | 1             |             |                    |
|                                          |                   | 11   | V559A               | 1             |             |                    |
| (Abu-Abed et al., 2012)                  | Acral             | 13   | K642E               | 1             | 24          | 11, 13             |
| (Curtin, Busam, Pinkel, & Bastian, 2006) | Acral             | 11   | Y553N               | 1             | 28          | 11, 13, 17, 18     |
|                                          |                   | 13   | R634W               | 1             |             |                    |
|                                          |                   | 13   | K642E               | 1             |             |                    |
| (Shim et al., 2017)                      | Acral & Subungual | 11   | L576P               | 2             | 28          | Hotspots of 11, 13 |
|                                          |                   | 13   | V654A               | 1             |             |                    |
| (Dai et al., 2013)                       | Acral & Subungual | 9    | A502V               | 1             | 39          | 9, 11, 13, 17      |
|                                          |                   | 11   | E583_F584insPYDHKWE | 1             |             |                    |
|                                          |                   | 9    | A507T               | 1             |             |                    |
|                                          |                   | 13   | V654M               | 1             |             |                    |
|                                          |                   | 9    | V474I               | 1             |             |                    |
|                                          |                   | 9    | V489I & A493T       | 1             |             |                    |
|                                          |                   | 17   | G803D               | 1             |             |                    |
|                                          |                   | 13   | K642E               | 1             |             |                    |
|                                          |                   | 17   | D816V               | 1             |             |                    |
| (Kong et al., 2011)                      | Acral             | 9    | V489I               | 1             | 193         | 9, 11, 13, 17, 18  |
|                                          |                   | 9    | E490G               | 1             |             |                    |
|                                          |                   | 11   | Y553N               | 1             |             |                    |
|                                          |                   | 11   | I563V               | 1             |             |                    |
|                                          |                   | 11   | W582stop            | 1             |             |                    |
|                                          |                   | 11   | N566D & A829V       | 1             |             |                    |
|                                          |                   | 11   | L576P               | 6             |             |                    |
|                                          |                   | 11   | L576F               | 1             |             |                    |
|                                          |                   | 13   | E633G               | 1             |             |                    |
|                                          |                   | 13   | G648S               | 1             |             |                    |
|                                          |                   | 13   | K642E               | 1             |             |                    |
|                                          |                   | 17   | I817T               | 1             |             |                    |
|                                          |                   | 17   | N822K               | 1             |             |                    |

|                            |                   |        |               |      |     |                   |
|----------------------------|-------------------|--------|---------------|------|-----|-------------------|
|                            |                   | 18     | C844Y         | 1    |     |                   |
|                            |                   | 18     | W853stop      | 1    |     |                   |
|                            |                   | 18     | L859P         | 1    |     |                   |
| (Zebary et al., 2013)      | Acral & Subungual | 11     | L576P         | 5    | 88  | 9, 11, 13, 17, 18 |
|                            |                   | 11     | V560D         | 1    |     |                   |
|                            |                   | 11     | D572G         | 1    |     |                   |
|                            |                   | 11     | V559del       | 1    |     |                   |
|                            |                   | 11     | D579del       | 2    |     |                   |
|                            |                   | 11     | P577del       | 1    |     |                   |
|                            |                   | 13     | K642E         | 1    |     |                   |
|                            |                   | 17     | Y823C         | 1    |     |                   |
| (X. J. Kang et al., 2016)  | Acral             | 13     | K642E         | 1    | 35  | 11, 13            |
|                            |                   | 11     | L576P         | 5    |     |                   |
| (Colombino et al., 2013)   | Acral             | 11     | D579del       | 1    | 11  | 9, 11, 13, 17, 18 |
| (Jin et al., 2013)         | Acral             | 9      | V474I         | 1    | 110 | 9, 11, 13, 17     |
|                            |                   | 11     | L576P         | 2    |     |                   |
|                            |                   | 13     | S639P         | 1    |     |                   |
|                            |                   | 13     | K642E         | 2    |     |                   |
|                            |                   | 13     | G664S         | 1    |     |                   |
|                            |                   | 11, 17 | L576P & I817L | 1    |     |                   |
| (Oyama et al., 2015)       | Acral             | 9      | V489G         | 1    | 20  | 9, 11, 13, 17, 18 |
|                            |                   | 11     | R588K         | 1    |     |                   |
|                            |                   | 11     | D579G         | 1    |     |                   |
| (Moon et al., 2018)        | Acral             | 1      | R19H & V654A  | 1    | 64  | 1 - 21            |
|                            |                   | 11     | V560D         | 1    |     |                   |
|                            |                   | 17, 11 | I817L & L576P | 1    |     |                   |
|                            |                   | 17     | Y823D         | 1    |     |                   |
|                            |                   | 13     | K642E         | 2    |     |                   |
|                            |                   | 11     | L576P         | 1    |     |                   |
| (Lin et al., 2013)         | Acral             | none   | none          | None | 20  | 11, 13, 17, 18    |
| (Ashida et al., 2009)      | Acral             | 13     | K642E         | 1    | 16  | 11, 13, 17, 18    |
|                            |                   | 17     | D820Y         | 1    |     |                   |
| (Schoenewolf et al., 2012) | Acral             | 11     | L576P         | 2    | 41  | 9, 11, 13, 17, 18 |
|                            |                   | 13     | K642E         | 1    |     |                   |
|                            |                   | 13     | T632I         | 1    |     |                   |

|                                       |                     |        |               |   |    |                   |
|---------------------------------------|---------------------|--------|---------------|---|----|-------------------|
| (Handolias et al., 2010)              | Acral               | 17     | D820Y         | 1 | 16 | 11, 13, 17        |
| (Punternvoll, Molven, & Akslen, 2014) | Acral<br>Acral      | 11     | D579del       | 1 | 36 | 9, 11, 13, 17, 18 |
|                                       |                     | 18     | S864L         | 1 |    |                   |
|                                       |                     | 13     | K642E         | 1 |    |                   |
| (Carvajal et al., 2011)               | Acral               | 11     | L576P         | 3 | 84 | 9, 11, 13, 17, 18 |
|                                       |                     | 11     | V559G         | 1 |    |                   |
|                                       |                     | 11     | W557R         | 1 |    |                   |
|                                       |                     | 13     | K642E         | 3 |    |                   |
|                                       |                     | 13     | I653T         | 1 |    |                   |
|                                       |                     | 13     | G648D         | 1 |    |                   |
|                                       |                     | 17     | D820Y         | 1 |    |                   |
|                                       |                     | 17     | L813P         | 1 |    |                   |
|                                       |                     | 18     | P838L         | 1 |    |                   |
|                                       |                     | 18     | S850G         | 1 |    |                   |
|                                       |                     | 11, 18 | E554K, Y846C  | 1 |    |                   |
|                                       |                     | 17     | K818Q, N822Y  | 1 |    |                   |
|                                       |                     | 13     | L647F, G648D  | 1 |    |                   |
| 18                                    | S840I, L859P, L862P | 1      |               |   |    |                   |
| (Comodo-Navarro et al., 2020)         | Acral               | 11     | D572N         | 1 | 25 | 11, 13            |
|                                       |                     | 11, 13 | P585T & Y646H | 1 |    |                   |
|                                       |                     | 11     | P585T & Y568D | 1 |    |                   |
|                                       |                     | 11     | Y578C         | 1 |    |                   |
|                                       |                     | 13     | K642R         | 2 |    |                   |
|                                       |                     | 13     | G658E         | 1 |    |                   |
|                                       |                     | 11     | P585T & M552I | 1 |    |                   |
|                                       |                     | 13     | C660R         | 1 |    |                   |
| (Dika et al., 2020)                   | Acral and Subungual | 13     | N655K         | 1 | 29 | 9, 11, 13, 17     |
|                                       |                     | 13     | K642E         | 1 |    |                   |
|                                       |                     | 11     | P551L         | 1 |    |                   |
|                                       |                     | 17     | D816N         | 1 |    |                   |
|                                       |                     | 11     | V560D         | 1 |    |                   |
| (Terada, 2010)                        | Acral               | 11     | V559A         | 1 | 2  | 9, 11, 13, 17     |
| (Yun et al., 2011)                    | Acral               | 11     | K558R         | 1 | 92 | 11, 13, 17, 18    |
|                                       |                     | 11     | V559A         | 1 |    |                   |
|                                       |                     | 11     | L576P         | 1 |    |                   |



|                           |                     |    |                    |   |     |                    |
|---------------------------|---------------------|----|--------------------|---|-----|--------------------|
|                           |                     | 13 | N655K              | 1 |     |                    |
| (Minor et al., 2012)      | Acral               | 13 | E635G              | 1 | 22  | 9, 11, 13, 17, 18  |
|                           |                     | 11 | W557R, G565E       | 1 |     |                    |
|                           |                     | 11 | L576P              | 1 |     |                    |
| (Zaremba et al., 2019)    | Acral and Subungual | 11 | L576P              | 1 | 50  | 1 - 21             |
|                           |                     | 13 | K642E              | 1 |     |                    |
|                           |                     | 18 | A829P              | 1 |     |                    |
| (Shi et al., 2019)        | Acral               | 11 | L576P              | 1 | 29  | 1 - 21             |
|                           |                     | 11 | Y578C              | 1 |     |                    |
|                           |                     | 17 | D820Y              | 1 |     |                    |
|                           |                     | 16 | E761stop           | 1 |     |                    |
| (Yeh et al., 2019)        | Acral               | 17 | D816V              | 1 | 122 | 1 - 21             |
|                           |                     | 17 | D820G              | 1 |     |                    |
|                           |                     | 17 | D820Y              | 1 |     |                    |
|                           |                     | 13 | K642E              | 3 |     |                    |
|                           |                     | 11 | L576P              | 4 |     |                    |
|                           |                     | 17 | N822K              | 1 |     |                    |
|                           |                     | 11 | T574delinsTQLPYDQT | 1 |     |                    |
|                           |                     | 11 | V559D              | 1 |     |                    |
|                           |                     | 11 | W557R              | 1 |     |                    |
| (Hilke et al., 2020)      | Acral               | 13 | K642E              | 1 | 14  | 1 - 21             |
|                           |                     | 13 | S628G              | 1 |     |                    |
|                           |                     | 8  | C443S              | 1 |     |                    |
| (Borkowska et al., 2020)  | Subungual           | 11 | Gln575_Pro577del   | 1 | 31  | Hotspots of 11, 13 |
|                           |                     | 11 | L576P              | 1 |     |                    |
|                           |                     | 11 | L576P, V559D       | 1 |     |                    |
|                           |                     | 11 | Asp579del          | 1 |     |                    |
| (Zou et al., 2020)        | Acral               | 17 | D816H              | 1 | 54  | 1 - 21             |
|                           |                     | 11 | V559D              | 1 |     |                    |
|                           |                     | 11 | P573_D579dup       | 1 |     |                    |
|                           |                     | 17 | S840N, D820V       | 1 |     |                    |
|                           |                     | 11 | L576P              | 2 |     |                    |
|                           |                     | 17 | A829P              | 1 |     |                    |
|                           |                     | 13 | K642E              | 1 |     |                    |
| (Cirenajwis et al., 2017) | Acral               | 13 | K642E              | 1 | 6   | 1 - 21             |
|                           |                     | 17 | N822K              | 1 |     |                    |

|                         |       |    |       |   |    |                    |
|-------------------------|-------|----|-------|---|----|--------------------|
| (Sheen et al.,<br>2020) | Acral | 17 | N822K | 2 | 45 | 1 - 21             |
|                         |       | 13 | K642E | 2 |    |                    |
|                         |       | 17 | D820Y | 1 |    |                    |
|                         |       | 3  | T84M  | 1 |    |                    |
|                         |       | 11 | L576P | 4 |    |                    |
|                         |       | 11 | D572G | 1 |    |                    |
| (Niu et al.,<br>2013)   | Acral | 13 | K642E | 1 | 30 | Hotspots of 11, 13 |
|                         |       | 11 | L576P | 1 |    |                    |

## References

- Abu-Abed, S., Pennell, N., Petrella, T., Wright, F., Seth, A., & Hanna, W. (2012). KIT gene mutations and patterns of protein expression in mucosal and acral melanoma. *J Cutan Med Surg*, *16*(2), 135-142. doi:10.2310/7750.2011.11064
- Akslen, L. A., Puntervoll, H., Bachmann, I. M., Straume, O., Vuhahula, E., Kumar, R., & Molven, A. (2008). Mutation analysis of the EGFR-NRAS-BRAF pathway in melanomas from black Africans and other subgroups of cutaneous melanoma. *Melanoma Res*, *18*(1), 29-35. doi:10.1097/CMR.0b013e3282f32517
- Ashida, A., Takata, M., Murata, H., Kido, K., & Saida, T. (2009). Pathological activation of KIT in metastatic tumors of acral and mucosal melanomas. *Int J Cancer*, *124*(4), 862-868. doi:10.1002/ijc.24048
- Borkowska, A., Szumera-Cieckiewicz, A., Spalek, M., Teterycz, P., Czarnecka, A., Kowalik, A., & Rutkowski, P. (2020). Mutation profile of primary subungual melanomas in Caucasians. *Oncotarget*, *11*(25), 2404-2413. doi:10.18632/oncotarget.27642
- Carvajal, R. D., Antonescu, C. R., Wolchok, J. D., Chapman, P. B., Roman, R. A., Teitcher, J., . . . Schwartz, G. K. (2011). KIT as a therapeutic target in metastatic melanoma. *JAMA*, *305*(22), 2327-2334. doi:10.1001/jama.2011.746
- Choi, Y. D., Chun, S. M., Jin, S. A., Lee, J. B., & Yun, S. J. (2013). Amelanotic acral melanomas: clinicopathological, BRAF mutation, and KIT aberration analyses. *J Am Acad Dermatol*, *69*(5), 700-707. doi:10.1016/j.jaad.2013.06.035
- Cirenajwis, H., Lauss, M., Ekedahl, H., Torngren, T., Kvist, A., Saal, L. H., . . . Jonsson, G. (2017). NF1-mutated melanoma tumors harbor distinct clinical and biological characteristics. *Mol Oncol*, *11*(4), 438-451. doi:10.1002/1878-0261.12050
- Colombino, M., Lissia, A., Franco, R., Botti, G., Ascierto, P. A., Manca, A., . . . Cossu, A. (2013). Unexpected distribution of cKIT and BRAF mutations among southern Italian patients with sinonasal melanoma. *Dermatology*, *226*(3), 279-284. doi:10.1159/000350683
- Comodo-Navarro, A. N., Fernandes, M., Barcelos, D., Carapeto, F. C. L., Guimaraes, D. P., de Sousa Moraes, L., . . . Landman, G. (2020). Intratumor Heterogeneity of KIT Gene Mutations in Acral Lentiginous Melanoma. *Am J Dermatopathol*, *42*(4), 265-271. doi:10.1097/DAD.0000000000001475
- Curtin, J. A., Busam, K., Pinkel, D., & Bastian, B. C. (2006). Somatic activation of KIT in distinct subtypes of melanoma. *J Clin Oncol*, *24*(26), 4340-4346. doi:10.1200/JCO.2006.06.2984
- Dai, B., Cai, X., Kong, Y. Y., Yang, F., Shen, X. X., Wang, L. W., & Kong, J. C. (2013). Analysis of KIT expression and gene mutation in human acral melanoma: with a comparison between primary tumors and corresponding metastases/recurrences. *Hum Pathol*, *44*(8), 1472-1478. doi:10.1016/j.humpath.2013.01.007
- Dika, E., Veronesi, G., Altimari, A., Riefolo, M., Ravaioli, G. M., Piraccini, B. M., . . . Patrizi, A. (2020). BRAF, KIT, and NRAS Mutations of Acral Melanoma in White Patients. *Am J Clin Pathol*, *153*(5), 664-671. doi:10.1093/ajcp/aqz209
- Gao, H. W., Tsai, W. C., Perng, C. L., Wang, W. M., & Chiang, C. P. (2018). Distinct MAPK and PI3K pathway mutations in different melanoma types in Taiwanese individuals. *Eur J Dermatol*, *28*(4), 509-518. doi:10.1684/ejd.2018.3359
- Handolias, D., Hamilton, A. L., Salemi, R., Tan, A., Moodie, K., Kerr, L., . . . McArthur, G. A. (2010). Clinical responses observed with imatinib or sorafenib in melanoma patients expressing mutations in KIT. *Br J Cancer*, *102*(8), 1219-1223. doi:10.1038/sj.bjc.6605635
- Hilke, F. J., Sinnberg, T., Gschwind, A., Niessner, H., Demidov, G., Amaral, T., . . . Forscher, A. (2020). Distinct Mutation Patterns Reveal Melanoma Subtypes and Influence Immunotherapy Response in Advanced Melanoma Patients. *Cancers (Basel)*, *12*(9). doi:10.3390/cancers12092359
- Jin, S. A., Chun, S. M., Choi, Y. D., Kweon, S. S., Jung, S. T., Shim, H. J., & Yun, S. J. (2013). BRAF mutations and KIT aberrations and their clinicopathological correlation in 202 Korean melanomas. *J Invest Dermatol*, *133*(2), 579-582. doi:10.1038/jid.2012.338
- Kang, X., Zeng, Y., Liang, J., Li, J., Ren, D., Chai, L., . . . Wang, W. (2018). Aberrations and clinical significance of BRAF in malignant melanoma: A series of 60 cases in Chinese Uyghur. *Medicine (Baltimore)*, *97*(1), e9509. doi:10.1097/MD.00000000000009509
- Kang, X. J., Shi, X. H., Chen, W. J., Pu, X. M., Sun, Z. Z., Halifu, Y., . . . Ren, D. Y. (2016). Analysis of KIT mutations and c-KIT expression in Chinese Uyghur and Han patients with melanoma. *Clin Exp Dermatol*, *41*(1), 81-87. doi:10.1111/ced.12659

- Kong, Y., Si, L., Zhu, Y., Xu, X., Corless, C. L., Flaherty, K. T., . . . Guo, J. (2011). Large-scale analysis of KIT aberrations in Chinese patients with melanoma. *Clin Cancer Res*, *17*(7), 1684-1691. doi:10.1158/1078-0432.CCR-10-2346
- Lang, J., & MacKie, R. M. (2005). Prevalence of exon 15 BRAF mutations in primary melanoma of the superficial spreading, nodular, acral, and lentigo maligna subtypes. *J Invest Dermatol*, *125*(3), 575-579. doi:10.1111/j.0022-202X.2005.23833.x
- Lin, Y. C., Chang, Y. M., Ho, J. Y., Lin, H. C., Tsai, Y. M., Chiang, C. P., . . . Gao, H. W. (2013). C-kit expression of melanocytic neoplasm and association with clinicopathological parameters and anatomic locations in Chinese people. *Am J Dermatopathol*, *35*(5), 569-575. doi:10.1097/DAD.0b013e318279566a
- Minor, D. R., Kashani-Sabet, M., Garrido, M., O'Day, S. J., Hamid, O., & Bastian, B. C. (2012). Sunitinib therapy for melanoma patients with KIT mutations. *Clin Cancer Res*, *18*(5), 1457-1463. doi:10.1158/1078-0432.CCR-11-1987
- Moon, K. R., Choi, Y. D., Kim, J. M., Jin, S., Shin, M. H., Shim, H. J., . . . Yun, S. J. (2018). Genetic Alterations in Primary Acral Melanoma and Acral Melanocytic Nevus in Korea: Common Mutated Genes Show Distinct Cytomorphological Features. *J Invest Dermatol*, *138*(4), 933-945. doi:10.1016/j.jid.2017.11.017
- Niu, H. T., Zhou, Q. M., Wang, F., Shao, Q., Guan, Y. X., Wen, X. Z., . . . Zhang, X. S. (2013). Identification of anaplastic lymphoma kinase break points and oncogenic mutation profiles in acral/mucosal melanomas. *Pigment Cell Melanoma Res*, *26*(5), 646-653. doi:10.1111/pcmr.12129
- Oyama, S., Funasaka, Y., Watanabe, A., Takizawa, T., Kawana, S., & Saeki, H. (2015). BRAF, KIT and NRAS mutations and expression of c-KIT, phosphorylated extracellular signal-regulated kinase and phosphorylated AKT in Japanese melanoma patients. *J Dermatol*, *42*(5), 477-484. doi:10.1111/1346-8138.12822
- Puig-Butille, J. A., Badenas, C., Ogbah, Z., Carrera, C., Aguilera, P., Malvehy, J., & Puig, S. (2013). Genetic alterations in RAS-regulated pathway in acral lentiginous melanoma. *Exp Dermatol*, *22*(2), 148-150. doi:10.1111/exd.12080
- Punternvoll, H. E., Molven, A., & Akslen, L. A. (2014). Frequencies of KIT and GNAQ mutations in acral melanoma. *J Cutan Pathol*, *41*(11), 893-894. doi:10.1111/cup.12382
- Schoenewolf, N. L., Bull, C., Belloni, B., Holzmann, D., Tonolla, S., Lang, R., . . . Dummer, R. (2012). Sinonasal, genital and acrolentiginous melanomas show distinct characteristics of KIT expression and mutations. *Eur J Cancer*, *48*(12), 1842-1852. doi:10.1016/j.ejca.2012.02.049
- Sheen, Y. S., Liao, Y. H., Liao, J. Y., Lin, M. H., Hsieh, Y. C., Jee, S. H., & Chu, C. Y. (2016). Prevalence of BRAF and NRAS mutations in cutaneous melanoma patients in Taiwan. *J Formos Med Assoc*, *115*(2), 121-127. doi:10.1016/j.jfma.2015.02.001
- Sheen, Y. S., Tan, K. T., Tse, K. P., Liao, Y. H., Lin, M. H., Chen, J. S., . . . Chu, C. Y. (2020). Genetic alterations in primary melanoma in Taiwan. *Br J Dermatol*, *182*(5), 1205-1213. doi:10.1111/bjd.18425
- Shi, K., Zhang, B., Kong, B. Y., Zhang, Y., Igartua, C., Mohan, L. S., . . . Gerami, P. (2019). Distinct Genomic Features in a Retrospective Cohort of Mucosal, Acral and Vulvovaginal Melanomas. *J Am Acad Dermatol*. doi:10.1016/j.jaad.2019.07.017
- Shim, J. H., Shin, H. T., Park, J., Park, J. H., Lee, J. H., Yang, J. M., . . . Lee, D. Y. (2017). Mutational profiling of acral melanomas in Korean populations. *Exp Dermatol*, *26*(10), 883-888. doi:10.1111/exd.13321
- Si, L., Kong, Y., Xu, X., Flaherty, K. T., Sheng, X., Cui, C., . . . Guo, J. (2012). Prevalence of BRAF V600E mutation in Chinese melanoma patients: large scale analysis of BRAF and NRAS mutations in a 432-case cohort. *Eur J Cancer*, *48*(1), 94-100. doi:10.1016/j.ejca.2011.06.056
- Terada, T. (2010). Low incidence of KIT gene mutations and no PDGFRA gene mutations in primary cutaneous melanoma: an immunohistochemical and molecular genetic study of Japanese cases. *Int J Clin Oncol*, *15*(5), 453-456. doi:10.1007/s10147-010-0087-0
- Torres-Cabala, C. A., Wang, W. L., Trent, J., Yang, D., Chen, S., Galbincea, J., . . . Ivan, D. (2009). Correlation between KIT expression and KIT mutation in melanoma: a study of 173 cases with emphasis on the acral-lentiginous/mucosal type. *Mod Pathol*, *22*(11), 1446-1456. doi:10.1038/modpathol.2009.116
- Uhara, H., Ashida, A., Koga, H., Ogawa, E., Uchiyama, A., Uchiyama, R., . . . Okuyama, R. (2014). NRAS mutations in primary and metastatic melanomas of Japanese patients. *Int J Clin Oncol*, *19*(3), 544-548. doi:10.1007/s10147-013-0573-2
- Yeh, I., Jorgenson, E., Shen, L., Xu, M., North, J. P., Shain, A. H., . . . Asgari, M. M. (2019). Targeted Genomic Profiling of Acral Melanoma. *J Natl Cancer Inst*, *111*(10), 1068-1077. doi:10.1093/jnci/djz005
- Yun, J., Lee, J., Jang, J., Lee, E. J., Jang, K. T., Kim, J. H., & Kim, K. M. (2011). KIT amplification and gene mutations in acral/mucosal melanoma in Korea. *APMIS*, *119*(6), 330-335. doi:10.1111/j.1600-0463.2011.02737.x
- Zaremba, A., Murali, R., Jansen, P., Moller, I., Sucker, A., Paschen, A., . . . Cosgarea, I. (2019). Clinical and genetic analysis of melanomas arising in acral sites. *Eur J Cancer*, *119*, 66-76. doi:10.1016/j.ejca.2019.07.008

- Zebary, A., Omholt, K., Vassilaki, I., Hoiom, V., Linden, D., Viberg, L., . . . Hansson, J. (2013). KIT, NRAS, BRAF and PTEN mutations in a sample of Swedish patients with acral lentiginous melanoma. *J Dermatol Sci*, 72(3), 284-289. doi:10.1016/j.jdermsci.2013.07.013
- Zou, Z., Ou, Q., Ren, Y., Lv, Q., Qin, L., Zhao, L., . . . Liu, B. (2020). Distinct genomic traits of acral and mucosal melanomas revealed by targeted mutational profiling. *Pigment Cell Melanoma Res*, 33(4), 601-611. doi:10.1111/pcmr.12865
